# Supplementary material for: Enhanced photon management in silicon thin film solar cells with different front and back interface texture
Source: PubMed Central journal article supplement (PMC4969606; doi:10.1038/srep29639), 2016-08-02
Supplement: srep29639-s1.pdf [file srep29639-s1.pdf]

# **Enhanced photon management in silicon thin film solar cells with different front and back interface texture**

**Asman Tamang<sup>1</sup>, Aswin Hongsingthong<sup>2</sup>, Vladislav Jovanov<sup>1</sup>, Porponth Sichanugrist<sup>2,4</sup>, Bakhtiar A. Khan<sup>1</sup>, Rahul Dewan<sup>1</sup>, Makoto Konagai<sup>2,3,4,5</sup> & Dietmar Knipp<sup>1,6,\*</sup>**

<sup>1</sup>Research Center for Functional Materials and Nanomolecular Science, Electronic Devices and Nanophotonics Laboratory, Jacobs University Bremen, Campus Ring 1, 28759 Bremen, Germany

<sup>2</sup>Department of Physical Electronics, Tokyo Institute of Technology, 2-12-1 Ookayama, Meguro-ku, Tokyo, 152-8550, Japan

<sup>3</sup>Photovoltaics Research Center (PVREC), Tokyo Institute of Technology, 2-12-1 Ookayama, Meguro-ku, Tokyo 158-0082, Japan

<sup>4</sup>now with MEXT/FUTURE-PV Innovation Research, JST, Fukushima 963-0215, Japan

<sup>5</sup>now with Advanced Research Lab., Tokyo City University, 8-5-1, Todoroki, Setagaya-ku, Tokyo 158-0082, Japan

<sup>6</sup>currently with Geballe Laboratory for Advanced Materials, Department of Materials Science and Engineering, Stanford University, Stanford, CA 94305, USA

\*) Corresponding author: dietmarknipp@gmail.com (D. Knipp)

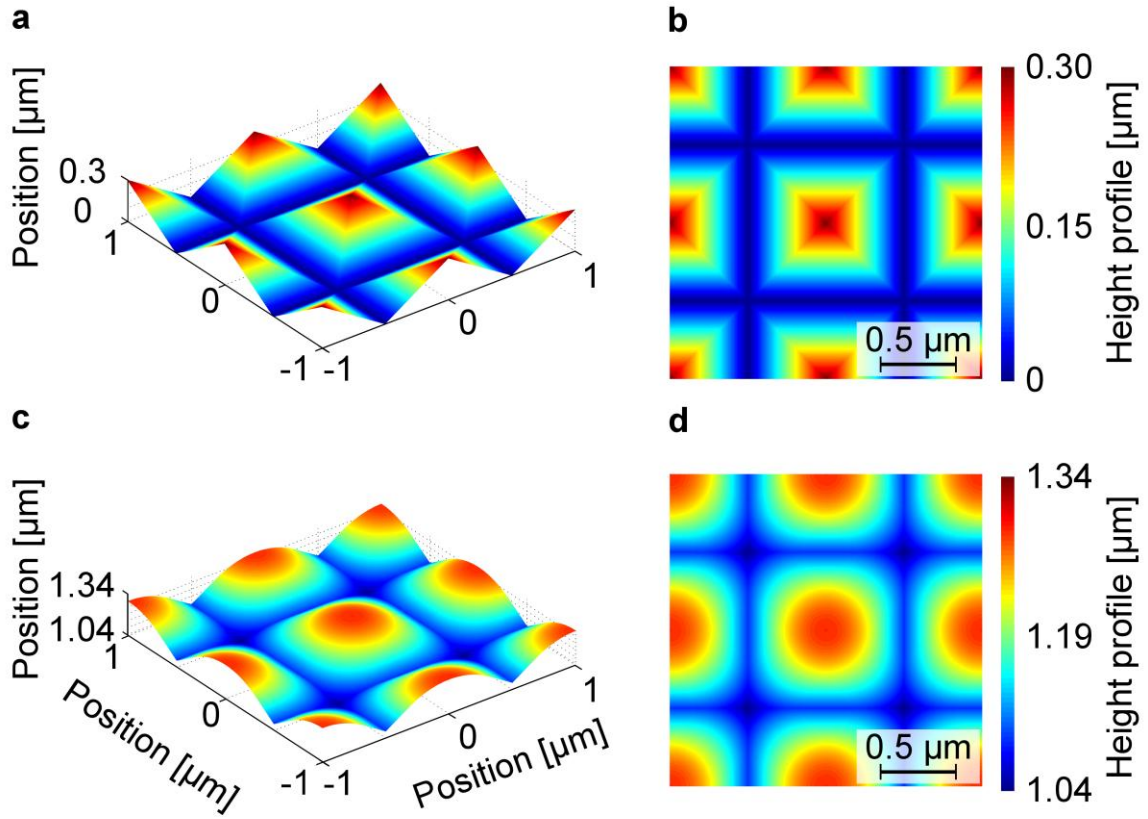

**Supplementary Figure S1. Computationally generated surface morphologies for single textured solar cell.** (a) Side and (b) top views of front TCO layer. (c) Side and (d) top views of silicon film.

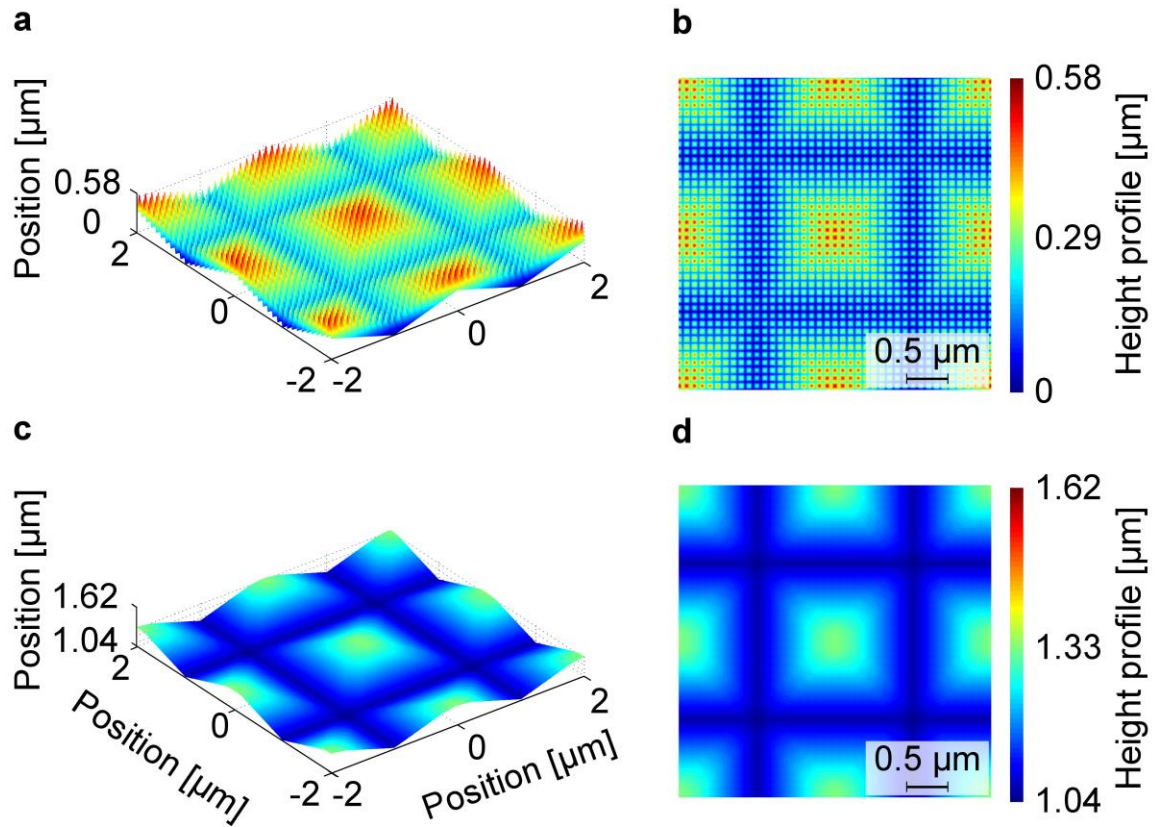

**Supplementary Figure S2. Computationally generated surface morphologies for multiscale textured solar cell with small textures period of  $0.1 \mu\text{m}$ .** (a) Side and (b) top views of front TCO layer. (c) Side and (d) top views of silicon film.

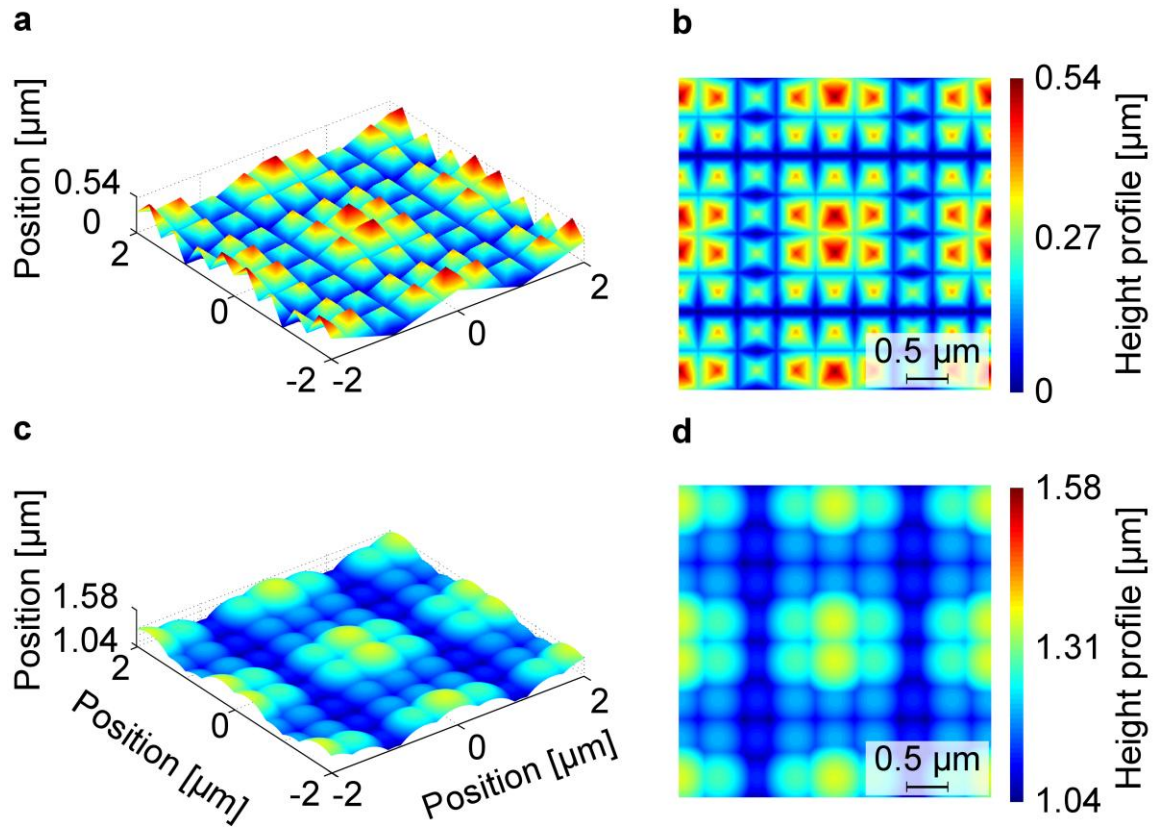

**Supplementary Figure S3. Computationally generated surface morphologies for multiscale textured solar cell with small textures period of  $0.5 \mu\text{m}$ .** (a) Side and (b) top views of front TCO layer. (c) Side and (d) top views of silicon film.

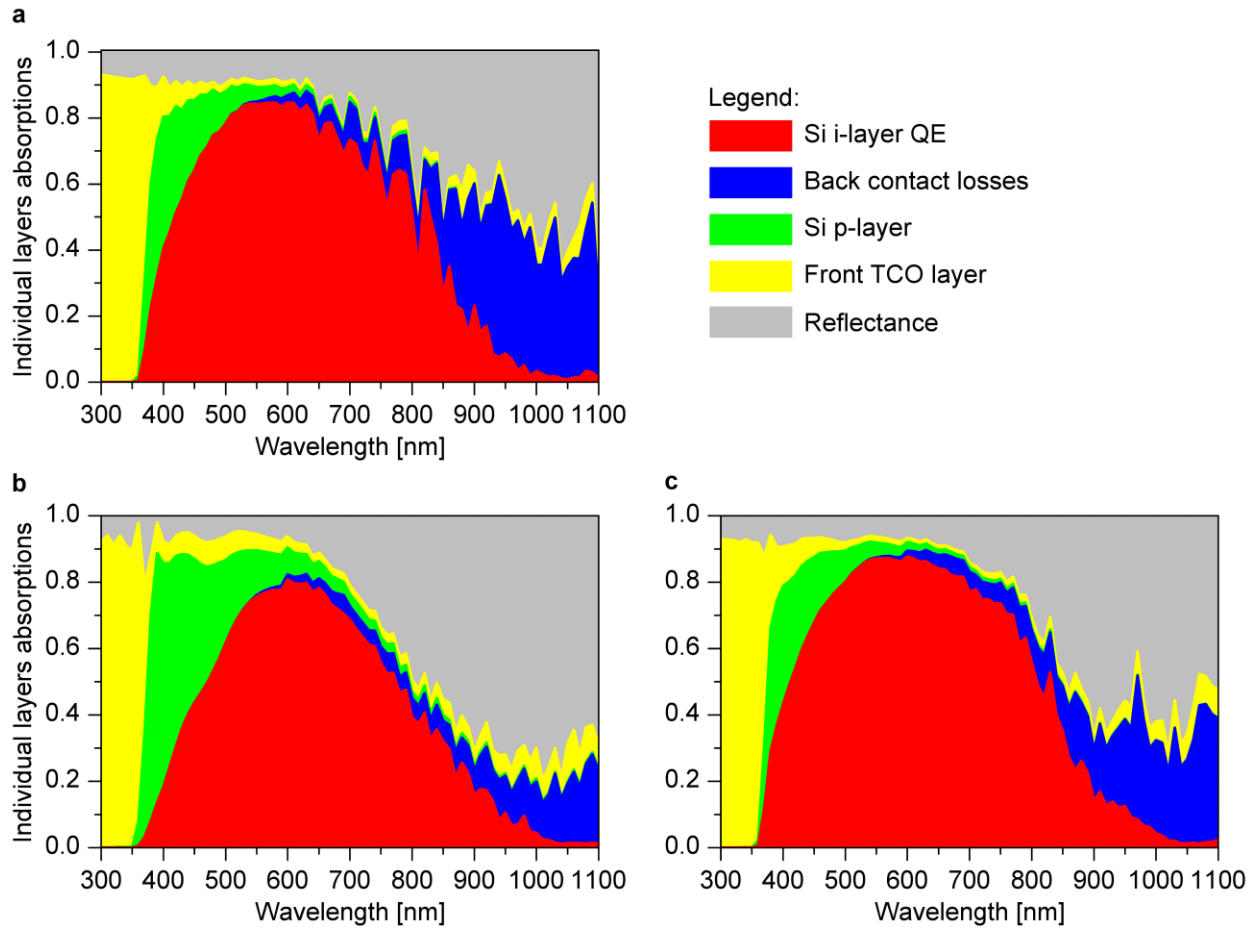

**Supplementary Figure S4. Individual layers absorptions of  $\mu\text{c-Si:H}$  solar cells.**

Simulated results are (a) single textured solar cell, multiscale textured solar cell with period of small textures of (b)  $0.1\ \mu\text{m}$  and (c)  $0.5\ \mu\text{m}$ .

**Supplementary Table S1.** Calculated currents for individual layers absorption of  $\mu\text{-Si:H}$  solar cells with single textured solar cell and multiscale textured interfaces.

|                                                   | Texture of solar cell interfaces     |                                                                   |                                                                   |
|---------------------------------------------------|--------------------------------------|-------------------------------------------------------------------|-------------------------------------------------------------------|
|                                                   | Single texture<br>$P=1\ \mu\text{m}$ | Multiscale texture,<br>$P_L=2\ \mu\text{m}, P_S=0.1\ \mu\text{m}$ | Multiscale texture,<br>$P_L=2\ \mu\text{m}, P_S=0.1\ \mu\text{m}$ |
| Short circuit current [ $\text{mA}/\text{cm}^2$ ] | 21.6                                 | 19.0                                                              | 23.0                                                              |
| Back contact losses [ $\text{mA}/\text{cm}^2$ ]   | 6.3                                  | 2.6                                                               | 4.5                                                               |
| Silicon p-layer [ $\text{mA}/\text{cm}^2$ ]       | 1.9                                  | 4.3                                                               | 1.8                                                               |
| Front TCO layer [ $\text{mA}/\text{cm}^2$ ]       | 2.3                                  | 2.9                                                               | 2.4                                                               |
| Reflectance losses [ $\text{mA}/\text{cm}^2$ ]    | 10.5                                 | 14.0                                                              | 11.1                                                              |
